# Supplementary material for: IL-27 amplifies cytokine responses to Gram-negative bacterial products and Salmonella typhimurium infection
Source: PubMed Central journal article supplement (PMC6135775; doi:10.1038/s41598-018-32007-y), 2018-09-12
Supplement: 41598_2018_32007_MOESM1_ESM.pdf [file 41598_2018_32007_MOESM1_ESM.pdf]

**IL-27 amplifies cytokine responses to Gram-negative bacterial products and *Salmonella typhimurium* infection**

C. Petes\*, N. Odoardi\*, S. M. Plater\*, N. L. Martin\*, K. Gee\*

\* Department of Biomedical and Molecular Sciences, Queen's University, Kingston, ON, Canada, K7L 3N6



**Supplementary Figure 1. Full immunoblot membranes.** THP-1 cells (A) and PMA-THP-1 cells (B) were stimulated with LPS-E (100ng/ml), LPS-S (100ng/ml), flagellin (Flag) (500ng/ml), IL-27 (50ng/ml), or combinations of TLR agonists plus IL-27 concomitantly as indicated for 15 minutes. Phosphorylation of NF- $\kappa$ Bp65 subunit (p-p65) was presented using immunoblotting on whole cell lysates. Membranes were stripped and re-probed for pan p65 as a loading control. Membranes shown are representative of three independent experiments.
